# Supplementary material for: Origin of Increased Reactivity in Rhenium-Mediated Cycloadditions of Tetrazines
Source: PubMed Central journal article supplement (PMC8453624; doi:10.1021/acs.joc.1c01564), 2021-09-01
Supplement: jo1c01564_si_001.pdf [file jo1c01564_si_001.pdf]

# Origin of Increased Reactivity in Rhenium-Mediated Cycloadditions of Tetrazines

Aneta Turlik,<sup>†</sup> K. N. Houk,<sup>†</sup> and Dennis Svatoněk<sup>\*,‡</sup>

<sup>†</sup>Department of Chemistry and Biochemistry, University of California, Los Angeles, California 90095-1569, United States

<sup>‡</sup>Institute of Applied Synthetic Chemistry, TU Wien, 1060 Vienna, Austria

\*[dennis.svatonek@tuwien.ac.at](mailto:dennis.svatonek@tuwien.ac.at)

---

## Contents

|                                                                                          |   |
|------------------------------------------------------------------------------------------|---|
| Computational methods.....                                                               | 2 |
| Computational data.....                                                                  | 2 |
| Figure S1. Other, higher-energy transition states for the [4+2] cycloaddition.....       | 2 |
| Table S1: PyFrag results of EDA at the B3LYP-D3/TZ2P level.....                          | 3 |
| Table S2: Summary of B3LYP-D3/6-311+G(d,p)/SDD-SMD(DCM) energies.....                    | 4 |
| Table S3: Orbital energies of starting materials and fragments at transition states..... | 4 |
| References.....                                                                          | 5 |

## Computational methods

Density functional theory (DFT) calculations were performed with Gaussian 16 RevA.03.<sup>1</sup> For each structure, all possible conformers were considered. Geometry optimizations were performed with the B3LYP functional,<sup>2, 3</sup> which was shown to closely match experimental values, augmented with Grimme's D3 empirical dispersion term,<sup>4-7</sup> and the SDD basis set for Re and 6-311+G(d,p)<sup>8</sup> for all other atoms. Dichloromethane solvation was modeled using the SMD solvation model.<sup>9</sup> Frequency calculations confirmed the optimized structures as minima (zero imaginary frequencies) or transition state structures (one imaginary frequency) on the potential energy surface. A quasi-harmonic correction was applied using the GoodVibes program.<sup>10</sup> Orbital energies were calculated at the same level of theory in the gas phase.

Distortion/interaction<sup>11</sup> and energy decomposition analysis<sup>12</sup> were performed in ADF (2019.304)<sup>13</sup> with PyFrag 2019<sup>14</sup> using B3LYP-D3/TZ2P in the gas phase on structures that were optimized with the B3LYP-D3/6-311+G(d,p)/SDD-SMD(DCM) level of theory.

## Computational data

Below are the additional high-energy transition states for the initial [4+2] cycloaddition including barriers (Figure S11), the results of EDA as provided by PyFrag at the transition states and consistent geometry for **TS-1a** and **TS-2a** (Table S1). Table S2 shows the energies of all discussed stationary points and the number of imaginary frequencies ( $N_{\text{imag}}$ ) associated with each structure. Table S3 provides the orbital energies of starting materials and fragments at transition states for **TS-1a** and **TS-2a**. Geometries are provided as \*.xyz files.

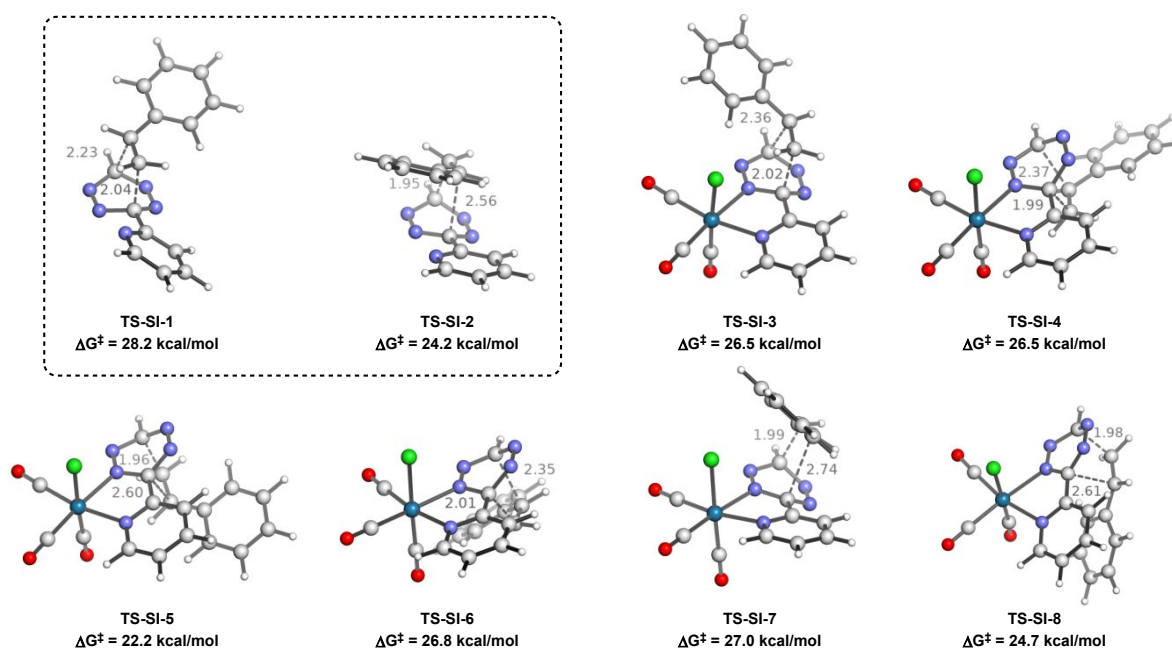

**Figure S1.** Other, higher-energy transition states for the [4+2] cycloaddition. **TS-SI-1** and **TS-SI-2** are the two other possible transition states without coordination to a Re complex, and **TS-SI-3** to **TS-SI-8** are transition states for Re complexes. **TS-SI-1**, **3**, **4**, and **6** lead to formation of *meta* products, and **TS-SI-2**, **5**, **7**, and **8** lead to formation of *ortho* products. **TS-SI-3** and **7** correspond to addition from the face with the Cl ligand, and **TS-SI-4**, **5**, **6**, **8** correspond to addition from the face with the CO ligand.

**Table S1:** PyFrag results of EDA at the B3LYP-D3/TZ2P level

| <b>EDA at the transition state</b> |                         |                           |                                    |                                       |                                      |                                   |                                     |                                     |                                               |                                             |
|------------------------------------|-------------------------|---------------------------|------------------------------------|---------------------------------------|--------------------------------------|-----------------------------------|-------------------------------------|-------------------------------------|-----------------------------------------------|---------------------------------------------|
| tetrazine                          | shorter bond length (Å) | Barrier height (kcal/mol) | $\Delta E_{\text{int}}$ (kcal/mol) | $\Delta V_{\text{Elstat}}$ (kcal/mol) | $\Delta E_{\text{Pauli}}$ (kcal/mol) | $\Delta E_{\text{OI}}$ (kcal/mol) | $\Delta E_{\text{disp}}$ (kcal/mol) | $\Delta E_{\text{dist}}$ (kcal/mol) | $\Delta E_{\text{dist,tetrazine}}$ (kcal/mol) | $\Delta E_{\text{dist,styrene}}$ (kcal/mol) |
| <b>Tz</b>                          | 1.954                   | 8.317                     | -17.284                            | -60.763                               | 124.199                              | -68.616                           | -12.104                             | 25.601                              | 17.325                                        | 8.276                                       |
| <b>Re-Tz</b>                       | 1.975                   | 2.062                     | -25.096                            | -59.739                               | 118.978                              | -70.367                           | -13.968                             | 27.158                              | 19.477                                        | 7.681                                       |

  

| <b>EDA at consistent geometry</b> |                         |                           |                                    |                                       |                                      |                                   |                                     |                                     |                                               |                                             |
|-----------------------------------|-------------------------|---------------------------|------------------------------------|---------------------------------------|--------------------------------------|-----------------------------------|-------------------------------------|-------------------------------------|-----------------------------------------------|---------------------------------------------|
|                                   | shorter bond length (Å) | Barrier height (kcal/mol) | $\Delta E_{\text{int}}$ (kcal/mol) | $\Delta V_{\text{Elstat}}$ (kcal/mol) | $\Delta E_{\text{Pauli}}$ (kcal/mol) | $\Delta E_{\text{OI}}$ (kcal/mol) | $\Delta E_{\text{disp}}$ (kcal/mol) | $\Delta E_{\text{dist}}$ (kcal/mol) | $\Delta E_{\text{dist,tetrazine}}$ (kcal/mol) | $\Delta E_{\text{dist,styrene}}$ (kcal/mol) |
| <b>Tz</b>                         | 1.950                   | 8.339                     | -17.719                            | -61.408                               | 125.472                              | -69.68                            | -12.104                             | 26.058                              | 17.608                                        | 8.450                                       |
| <b>Re-Tz</b>                      | 1.950                   | 2.227                     | -27.689                            | -63.574                               | 126.74                               | -76.879                           | -13.976                             | 29.915                              | 21.237                                        | 8.678                                       |

**Table S2:** Summary of B3LYP-D3/6-311+G(d,p)/SDD-SMD(DCM) energies

| Structure      | N <sub>imag</sub> | $\Delta E$<br>(au) | $\Delta H$<br>(au) | T $\Delta S$<br>(au) | $\Delta G_{298}$<br>(au) | $\Delta G_{298}$<br>(kcal/mol) | $\Delta G_{298}$<br>relative<br>to SM<br>(kcal/mol) |
|----------------|-------------------|--------------------|--------------------|----------------------|--------------------------|--------------------------------|-----------------------------------------------------|
| SM: Tz         | 0                 | -543.5851          | -543.4567          | 0.04383              | -543.5005                | -341051.5                      |                                                     |
| SM: Re-Tz      | 0                 | -1422.4632         | -1422.2976         | 0.06481              | -1422.3624               | -892545.2                      |                                                     |
| SM: St         | 0                 | -309.7505          | -309.6104          | 0.03837              | -309.6488                | -194307.4                      |                                                     |
| TS-1b          | 1                 | -853.3164          | -853.0474          | 0.05721              | -853.1046                | -535330.8                      | 28.1                                                |
| TS-1a          | 1                 | -853.3239          | -853.0547          | 0.05713              | -853.1118                | -535335.3                      | 23.5                                                |
| TS-2a          | 1                 | -1732.2055         | -1731.8991         | 0.07794              | -1731.9771               | -1086831.2                     | 21.4                                                |
| TS-2b          | 1                 | -1732.1974         | -1731.8914         | 0.07821              | -1731.9696               | -1086826.5                     | 26.1                                                |
| Int1a          | 0                 | -1732.2352         | -1731.9252         | 0.07613              | -1732.0013               | -1086846.4                     | 6.2                                                 |
| Int1b          | 0                 | -1732.2345         | -1731.9246         | 0.07668              | -1732.0012               | -1086846.4                     | 6.2                                                 |
| TS-3a          | 1                 | -1732.2244         | -1731.9171         | 0.07716              | -1731.9942               | -1086842.0                     | 10.6                                                |
| TS-3a'         | 1                 | -1732.2052         | -1731.8982         | 0.07742              | -1731.9756               | -1086830.3                     | 22.3                                                |
| TS-3b          | 1                 | -1732.2268         | -1731.9191         | 0.07748              | -1731.9965               | -1086843.4                     | 9.2                                                 |
| Int2a          | 0                 | -1622.7508         | -1622.4529         | 0.07554              | -1622.5284               | -1018151.2                     | -52.9                                               |
| Int2b          | 0                 | -1622.7501         | -1622.4526         | 0.07606              | -1622.5286               | -1018151.3                     | -53.1                                               |
| Int3a          | 0                 | -1622.7561         | -1622.4572         | 0.07558              | -1622.5328               | -1018153.9                     | -55.7                                               |
| N <sub>2</sub> | 0                 | -109.5543          | -109.5454          | 0.02174              | -109.5671                | -68754.4                       |                                                     |
| TS-SI-1        | 1                 | -853.3163          | -853.0472          | 0.05716              | -853.1043                | -535330.6                      | 28.2                                                |
| TS-SI-2        | 1                 | -853.3221          | -853.0531          | 0.05760              | -853.1107                | -535334.6                      | 24.2                                                |
| TS-SI-3        | 1                 | -1732.1970         | -1731.8910         | 0.07797              | -1731.9689               | -1086826.1                     | 26.5                                                |
| TS-SI-4        | 1                 | -1732.1969         | -1731.8908         | 0.07815              | -1731.9690               | -1086826.1                     | 26.5                                                |
| TS-SI-5        | 1                 | -1732.2047         | -1731.8982         | 0.07773              | -1731.9759               | -1086830.5                     | 22.2                                                |
| TS-SI-6        | 1                 | -1732.1977         | -1731.8909         | 0.07753              | -1731.9684               | -1086825.8                     | 26.8                                                |
| TS-SI-7        | 1                 | -1732.1952         | -1731.8894         | 0.07876              | -1731.9681               | -1086825.6                     | 27.0                                                |
| TS-SI-8        | 1                 | -1732.2014         | -1731.8941         | 0.07773              | -1731.9718               | -1086827.9                     | 24.7                                                |

**Table S3:** Orbital energies of starting materials and fragments at transition states

| Starting materials                            |      |        |      |         |      |
|-----------------------------------------------|------|--------|------|---------|------|
| Tetrazine                                     |      | Re-Tz  |      | Styrene |      |
| LUMO+1                                        | -2.5 | LUMO+1 | -3.1 | LUMO    | -1.3 |
| HOMO-1                                        | -7.5 | HOMO-6 | -8.1 | HOMO    | -6.3 |
| Fragments at transition state TS-1a and TS-2a |      |        |      |         |      |
| Tetrazine                                     |      | Re-Tz  |      | Styrene |      |
| LUMO                                          | -3.3 | LUMO   | -3.8 | LUMO    | -1.6 |
| HOMO-1                                        | -7.4 | HOMO-6 | -8.0 | HOMO    | -6.2 |

## References

1. Frisch, M. J.; Trucks, G. W.; Schlegel, H. B.; Scuseria, G. E.; Robb, M. A.; Cheeseman, J. R.; Scalmani, G.; Barone, V.; Petersson, G. A.; Nakatsuji, H.; Li, X.; Caricato, M.; Marenich, A. V.; Bloino, J.; Janesko, B. G.; Gomperts, R.; Mennucci, B.; Hratchian, H. P.; Ortiz, J. V.; Izmaylov, A. F.; Sonnenberg, J. L.; Williams; Ding, F.; Lipparini, F.; Egidi, F.; Goings, J.; Peng, B.; Petrone, A.; Henderson, T.; Ranasinghe, D.; Zakrzewski, V. G.; Gao, J.; Rega, N.; Zheng, G.; Liang, W.; Hada, M.; Ehara, M.; Toyota, K.; Fukuda, R.; Hasegawa, J.; Ishida, M.; Nakajima, T.; Honda, Y.; Kitao, O.; Nakai, H.; Vreven, T.; Throssell, K.; Montgomery Jr., J. A.; Peralta, J. E.; Ogliaro, F.; Bearpark, M. J.; Heyd, J. J.; Brothers, E. N.; Kudin, K. N.; Staroverov, V. N.; Keith, T. A.; Kobayashi, R.; Normand, J.; Raghavachari, K.; Rendell, A. P.; Burant, J. C.; Iyengar, S. S.; Tomasi, J.; Cossi, M.; Millam, J. M.; Klene, M.; Adamo, C.; Cammi, R.; Ochterski, J. W.; Martin, R. L.; Morokuma, K.; Farkas, O.; Foresman, J. B.; Fox, D. J. *Gaussian 16 Rev. A.03*, Wallingford, CT, 2016.
2. Vosko, S. H.; Wilk, L.; Nusair, M., Accurate spin-dependent electron liquid correlation energies for local spin density calculations: a critical analysis. *Can. J. Phys.* **1980**, *58* (8), 1200-1211.
3. Head-Gordon, M.; Pople, J. A.; Frisch, M. J., MP2 energy evaluation by direct methods. *Chem. Phys. Lett.* **1988**, *153* (6), 503-506.
4. Grimme, S.; Antony, J.; Ehrlich, S.; Krieg, H., A consistent and accurate ab initio parametrization of density functional dispersion correction (DFT-D) for the 94 elements H-Pu. *J. Chem. Phys.* **2010**, *132* (15), 154104.
5. Lee, C.; Yang, W.; Parr, R. G., Development of the Colle-Salvetti correlation-energy formula into a functional of the electron density. *Phys. Rev. B* **1988**, *37* (2), 785-789.
6. Becke, A. D., Density-functional thermochemistry. III. The role of exact exchange. *J. Chem. Phys.* **1993**, *98* (7), 5648-5652.
7. Stephens, P. J.; Devlin, F. J.; Chabalowski, C. F.; Frisch, M. J., Ab Initio Calculation of Vibrational Absorption and Circular Dichroism Spectra Using Density Functional Force Fields. *J. Phys. Chem.* **2002**, *98* (45), 11623-11627.
8. Krishnan, R.; Binkley, J. S.; Seeger, R.; Pople, J. A., Self-consistent molecular orbital methods. XX. A basis set for correlated wave functions. *J. Chem. Phys.* **1980**, *72* (1), 650-654.
9. Marenich, A. V.; Cramer, C. J.; Truhlar, D. G., Universal solvation model based on solute electron density and on a continuum model of the solvent defined by the bulk dielectric constant and atomic surface tensions. *J. Phys. Chem. B* **2009**, *113* (18), 6378-6396.
10. Luchini, G.; Alegre-Requena, J. V.; Funes-Ardoiz, I.; Paton, R. S., GoodVibes: automated thermochemistry for heterogeneous computational chemistry data. *F1000Research* **2020**, *9*, 291.
11. Bickelhaupt, F. M.; Houk, K. N., Analyzing Reaction Rates with the Distortion/Interaction-Activation Strain Model. *Angew. Chem. Int. Ed.* **2017**, *56* (34), 10070-10086.
12. Bickelhaupt, F. M.; Baerends, E. J., Kohn-Sham Density Functional Theory: Predicting and Understanding Chemistry. In *Rev. Comput. Chem.*, 2000; pp 1-86.
13. te Velde, G.; Bickelhaupt, F. M.; Baerends, E. J.; Fonseca Guerra, C.; van Gisbergen, S. J. A.; Snijders, J. G.; Ziegler, T., Chemistry with ADF. *J. Comput. Chem.* **2001**, *22* (9), 931-967.
14. Sun, X.; Soini, T. M.; Poater, J.; Hamlin, T. A.; Bickelhaupt, F. M., PyFrag 2019-Automating the exploration and analysis of reaction mechanisms. *J. Comput. Chem.* **2019**, *40* (25), 2227-2233.
